# Supplementary material for: Atypical DNA methylation, sRNA size distribution and female gametogenesis correlate with genome compaction in Utricularia gibba
Source: Research Square preprint supplement (doi:10.21203/rs.3.rs-235397/v1), 2021-02-24
Supplement: Supplementary file 1 [file 874e43a53e3ba96137ecdf01.xlsx]

## Sheet: Index
Dataset S1 Index
A. Plant growth conditions and equimolar selected conditions
B. Statistics of mapped reads against reference genome
C. Plant lncRNAs data for boxplot structure
D. sRNAs reads redundancy from 3 libraries.
E. List of Small RNA-seq datasets in other plants
F. RdDM canonical pathway in U. gibba

## Sheet: A
Plant growth conditions and equimolar selected conditions. This table show all the grown conditions of Utricularia and time extraction. Then the pools are generated.
Pool conditions	Extraction time	Observations
	24h	22 C at 16 light hours/8 dark hours. Ph= 5.7; N concentration= 2mM; P concentration=1mM
1. Control	7d
	15d
	12h	22 C at 16 light hours/8 dark hours. Ph=5.7; and N concentration= 50 microM
2. Nitrogen deficiency	7d
	15d
3. Trap/Nitrogen deficiency	7d	22 C at 16 light hours/8 dark hours; ph=5.7; N concentration=50 microM
	15d
4. Phosphorus deficiency	12h	22 C at 16 light hours/8 dark hours; ph=5.7; P concentration=5 microM
	7d
	15d
5. Trap/nitrogen deficiency	7d	22 C at 16 light hours/8 dark hours; ph=5.7; P concentration= 5microM
	15d
6. IAA	12h	22 C at 16 light hours/8 dark hours;ph=5.7 IAA concentration= 25 microM
	48h
	6d
7. BAP	12h	22 C at 16 light hours/8 dark hours;ph=5.7 ;BAP concentration= 25 microM
	48h
	6d
8. ABA	12h	22 C at 16 light hours/8 dark hours; ph=5.7; ABA concentration=4 microM
	48h
	6d
9. Salt stress	12h	22 C at 16 light hours/8 dark hours;ph=5.7; NaCl concentration= 100mM
	24h
	72h
10. Osmotic stress	12h	22 C at 16 light hours/8 dark hours; ph=5.7; PEG concentration= 20%
	24h
	48h
	72h
11. PH (4.0 and 8.0)	6h	22 C at 16 light hours/8 dark hours; ph=4.0 and ph= 8.0
	12h
	24h
	72h	37 C and 4 C at 16 light hours/8 dark hours; and constant light/darkness
12. Others (37C, 4C, light, darkness)	6h
	12h
	24h
	72h

## Sheet: B
Statistics of mapped reads against reference genome
Sample	Clean reads	Mapped reads	% of mapped reads	unmapped reads	% of unmapped reads
Control	26828586	25586778	95.4	1222991	4.6
-P	20362950	19431192	95.4	936696	4.6
-N	22359428	21377167	95.6	983814	4.4
-P traps	36209309	34655564	95.7	1557000	4.3
-N traps	21452888	20583015	95.9	879568	4.1
IAA	34432791	32757863	95.1	1687206	4.9
BAP	28267530	26939162	95.3	1328573	4.7
ABA	25915296	24586421	94.9	1321680	5.1
Osmotic	36628020	35095495	95.8	1538376	4.2
pH	30379522	29005752	95.5	1367078	4.5
Salt	34975274	33026302	94.4	1608862	4.6
Others	28483720	27214266	95.5	1281767	4.5
Total	346295314	330258977	95.375	15713611	4.54167

## Sheet: C
Plant lncRNAs data for boxplot structure
Organism	Number approx od lncRNAs	1 exon	2 exon	3 or more	Reference
Chlamydomonas	1440	30	40	30	Li et al., 2015. Scientific reports
Brachypodium	7500	80	15	5	De Quattro et al., 2017.Scientific reports
Wheat	20000	81	15	4	Bertolini bioarxiv
Maize	15000	85	15	14	Li et al., 2014. Genome Biology
Populus	2542	54	28	18	Shuai et al., 2014. Journal of Experimental Botany
Cotton	10820	60	20	20	Wang et al., 2015. New Phytologyst. Lu et al., 2016. Plos ONE.
trifoliate orange	6854	90	8	2	Yang et al., 2017. Scientific reports
Cucumber	3274	89	8	3	Hao et al., 2015. PLOS ONE
Medicago	20000	80	18	2	Wang et al., 2015. BMC plant biology
Utricularia	4624	86.18	11.5	2.32	Cervantes-Pérez et al., unpublished
Tomato	11800	60	32	8	Wang et al., 2015; Zhu et al., 2015. Journal of experimental Botany;ew Phytologist; Scarano et al., 2017. PLOS ONE
Chickpea	2284	60	32	8	Khemka et al., 2016. Scientific reports
Soybean	6018	90.3	6	3.7	Golicz et al., 2018

## Sheet: D
sRNAs reads reduncandy from 3 libraries.
Nutrients
Length	Unique	Redundant	Total	% Unique	% Redundant
17	41247	542295	583542	7.06839	92.9316
18	41678	819653	861331	4.83879	95.1612
19	47194	786321	833515	5.66205	94.338
20	53084	852135	905219	5.86422	94.1358
21	103346	3962516	4065862	2.5418	97.4582
22	73366	655165	728531	10.0704	89.9296
23	83218	552767	635985	13.0849	86.9151
24	197925	660689	858614	23.0517	76.9483
25	52866	600179	653045	8.09531	91.9047
26	35364	904690	940054	3.76191	96.2381
27	31941	467424	499365	6.39632	93.6037
28	27512	458500	486012	5.66077	94.3392
29	25948	373573	399521	6.49478	93.5052
30	24549	326837	351386	6.98633	93.0137
Plant hormones
Length	Unique	Redundant	Total	% Unique	% Redundant
17	46700	469104	515804	9.05383	90.9462
18	45458	503141	548599	8.2862	91.7138
19	47294	673195	720489	6.56415	93.4358
20	49995	674792	724787	6.89789	93.1021
21	87557	3419683	3507240	2.49646	97.5035
22	64774	523296	588070	11.0147	88.9853
23	73723	442322	516045	14.2862	85.7138
24	157936	454058	611994	25.8068	74.1932
25	46442	391311	437753	10.6092	89.3908
26	30729	619107	649836	4.72873	95.2713
27	27101	310205	337306	8.03454	91.9655
28	23010	312107	335117	6.86626	93.1337
29	20642	219880	240522	8.58217	91.4178
30	19046	169518	188564	10.1005	89.8995
Others
Length	Unique	Redundant	Total	% Unique	% Redundant
17	44032	475374	519406	8.47738	91.5226
18	42061	528798	570859	7.36802	92.632
19	43889	552730	596619	7.35629	92.6437
20	47282	640660	687942	6.87296	93.127
21	79900	2891156	2971056	2.68928	97.3107
22	60390	471790	532180	11.3477	88.6523
23	61913	415421	477334	12.9706	87.0294
24	125733	350771	476504	26.3866	73.6134
25	39564	545273	584837	6.76496	93.235
26	27875	870117	897992	3.10415	96.8959
27	24187	369346	393533	6.14612	93.8539
28	20143	267161	287304	7.01104	92.989
29	17825	206330	224155	7.95209	92.0479
30	16147	208346	224493	7.19265	92.8073

## Sheet: E
List of Small RNA-seq datasets in other plants
Organism	Reference	Clade	Tissue
Physcomitrella	Coruh et al., 2015, The Plant Cell	non-Angiosperm
Chlamydomonas	Zhao et al., 2007, Genes & Develompent	non-Angiosperm
Chara coraline	Montes-Chávez et al., 2014, Nature communications	non-Angiosperm
Volvox carteri	Montes-Chávez et al., 2014, Nature communications	non-Angiosperm
Marsilea quadrifolia	Montes-Chávez et al., 2014, Nature communications	non-Angiosperm
Picea abies	Montes-Chávez et al., 2014, Nature communications	non-Angiosperm
Ginko biloba	Montes-Chávez et al., 2014, Nature communications	non-Angiosperm
Cycas rumphii	Montes-Chávez et al., 2014, Nature communications	non-Angiosperm
Marchantia polymorpha	BioSample:SAMD00036797;SRR2179617	non-Angiosperm
Rice	Jeong et al., 2011, ThePlant Cell	Angiosperm	seedlings, root, shoot, panicle
Wheat	Sun et al., 2014, BMC Plant Biology	Angiosperm	dry grain, embryo, shoot, seedling leaf, seedling root, stem, young spike, grain after pollination
Arabidopsis	Lu et al., 2006, Genome Research	Angiosperm	inflorescence, seedlings
Maize	Nobuta et al., 2008,PNAS; Lunardon et al., 2016, Plant physiology; Montes-Chávez et al., 2014, Nature communications	Angiosperm	ears, shoot apical meristem, leaves
Populus	Klevebring et al., 2009. BMC genomics	Angiosperm	leaves fully expanded, leaves
Amborella trichopoda	Amborella consortium, 2013, Science	Angiosperm	leaves, flowers
Chickpea	Srivastava et al., 2015, Plant Science	Angiosperm	leaves, vegetative tissue
Shorgum bicolor	Calviño et al., 2011, BMC Genomics	Angiosperm	leaves, flower, grains
Sunflower	Florez-Zapata et al., 2016, BMC Genomics	Angiosperm	meiocites
Tomato	Cheng et al., 2016, BM genomics	Angiosperm	seedlings
Medicago	Lelandais-Briere et al., 2009, The Plant Cell	Angiosperm	roots, vegetative tissue, leaves, flowers
Capsicum annuum	Hwang et al., 2013, PLOS ONE	Angiosperm	leaf, stem, root, flower, fruit in diffferent stages
Lagenaia siceraria	Jagadeeswaran et al., 2012, BMC Genomics	Angiosperm	leaf steam and leaf flesh, seedlings
Cucuribita moschata	Jagadeeswaran et al., 2012, BMC Genomics	Angiosperm	leaf steam and leaf flesh, seedlings
cucurbita pepo	Jagadeeswaran et al., 2012, BMC Genomics	Angiosperm	leaf steam and leaf flesh, seedlings
Citrullus lanatus	Jagadeeswaran et al., 2012, BMC Genomics	Angiosperm	leaf steam and leaf flesh, seedlings
Apple	Guo et al., 2017, Frontiers in Plant Science; Daccord et al., 2017, Nature genetics	Angiosperm	vegetative tissue, bud flower, flower
Peach	Luo et al., 2013, PLOS ONE	Angiosperm	leaves, young stem,flowers, buds
Cotton	Ruan et al., 2009, Genomics	Angiosperm	seedlings
Soybean	Arikit et al., 2014, The Plant Cell	Angiosperm	leaves, flowers, nodules, seed

## Sheet: F
RdDM canonical pathway in U. gibba
Gene	AthID	Description	UgibbaID	Protein match	DNA match	Plaza evidence	Sinteny	Conserved protein Domains (pfam)	CogE Sinteny	Plaza	premature stop codon
NUCLEAR RNA POLYMERASE D1 (NRPD1)	AT1G63020	The unique, largest subunit of Pol IV	unitig_22.g5477.t1	yes	yes	Yes	yes	Yes	https://genomevolution.org/r/16qdn	https://bioinformatics.psb.ugent.be/plaza/versions/plaza_v4_dicots/gene_families/view/HOM04D000958	no
NRPE1	AT2G40030	The unique, largest subunit of Pol V	unitig_0.g1386.t1 and unitig_0.g1387.t1	yes	yes	Yes	yes	Yes*	https://genomevolution.org/r/16qdn	https://bioinformatics.psb.ugent.be/plaza/versions/plaza_v4_dicots/gene_families/view/HOM04D000958	no
NRPD2/NRPE2*	AT3G23780	The shared second largest subunit of Pol IV and Pol V	unitig_8.g3063.t1, unitig_8.g3064.t1	yes	yes	Yes	yes	Yes	https://genomevolution.org/r/16qef	https://bioinformatics.psb.ugent.be/plaza/versions/plaza_v4_dicots/gene_families/view/HOM04D000607	No*
NRPD4/NRPE4*	AT4G15950	The shared fourth largest subunit of Pol IV and Pol V	unitig_32.g11410.t1	partial	NO	Yes	NO	only a rpb4 domain; See Multiple Alignment Sequences	https://genomevolution.org/r/16rl7	https://bioinformatics.psb.ugent.be/plaza/versions/plaza_v4_dicots/gene_families/view/HOM04D168668	Yes
NRPE5	AT3G57080	A special fifth largest subunit of Pol V	unitig_21.g20910.t1	yes	yes	Yes	yes	additional tubulin binding cofactor;ALO and FAD superfamilies	https://genomevolution.org/r/16qep	https://bioinformatics.psb.ugent.be/plaza/versions/plaza_v4_dicots/gene_families/view/HOM04D001217	No
NRPE9B	AT4G16265	A special ninth largest subunit required for Pol V activity	unitig_22.g6354.t1	Yes	Yes	Yes	Yes	Yes	https://genomevolution.org/r/16qf4	https://bioinformatics.psb.ugent.be/plaza/versions/plaza_v4_dicots/gene_families/view/HOM04D003894	No
NRPB1	AT4G35800	The largest subunit of Pol II	unitig_0.g551.t1, unitig_0.g552.t1, unitig_0.g553.t1, uniti_0.g554.t1	yes	yes	Yes	Yes	Yes	https://genomevolution.org/r/16qfb	https://bioinformatics.psb.ugent.be/plaza/versions/plaza_v4_dicots/gene_families/view/HOM04D000760	No*
RNA-DEPENDENT RNA POLYMERASE 2 (RDR2)	AT4G11130	An RNA-dependent RNA polymerase	unitig_750.g28475.t1, unitig_750.g28476.t1	yes	yes	Yes	yes	Yes	https://genomevolution.org/r/16qfm	https://bioinformatics.psb.ugent.be/plaza/versions/plaza_v4_dicots/gene_families/view/HOM04D000871	No*
DICER-LIKE 3 (DCL3)	AT3G43920	A Dicer endonuclease that produces 24-nucleotide siRNAs	unitig_37.g12915.t1	yes	yes	Yes	Yes	mDCL?: Only robonuclease III and PAZ domain		https://bioinformatics.psb.ugent.be/plaza/versions/plaza_v4_dicots/gene_families/view/HOM04D000317	No
HUA ENHANCER 1 (HEN1)	AT4G20910	A small RNA methyltransferase	unitig_0.g923.t1 is not the homolog but one transcript yes	yes	yes	No	yes	Only the Hen1-motif C-terminal; Without dsRBD2, methyltrsnf	https://genomevolution.org/r/16qfu	https://bioinformatics.psb.ugent.be/plaza/versions/plaza_v4_dicots/gene_families/view/HOM04D003948	No
ARGONAUTE 4 (AGO4)	AT2G27040	An Argonaute protein AGO4	unitig_27.g25014.t1, unitig_22.g6185.t1	yes	yes	yes	yes	Yes	https://genomevolution.org/r/16qgf	https://bioinformatics.psb.ugent.be/plaza/versions/plaza_v4_dicots/gene_families/view/HOM04D000228	No
2006-08-01	AT2G32940	An Argonaute protein AGO6		yes	yes	yes	yes	*
AGO9	AT5G21150	An Argonaute protein AGO9		yes	yes	yes	yes	*
CLASSY 1 (CLSY1)	AT3G42670	A putative SWI/SNF chromatin remodeller; involved in the Pol IV pathway	unitig_46.g18735.t1	yes	yes	Yes	yes	YES	https://genomevolution.org/r/16qgw	https://bioinformatics.psb.ugent.be/plaza/versions/plaza_v4_dicots/gene_families/view/HOM04D000426	NO
DEFECTIVE IN RNA-DIRECTED DNA METHYLATION 1 (DRD1)	AT2G16390	A putative SWI/SNF chromatin remodeller; part of the DDR complex; involved in the Pol V pathway	unitig_21.g20795.t1	yes	yes	yes	yes	Yes	https://genomevolution.org/r/16qh9	https://bioinformatics.psb.ugent.be/plaza/versions/plaza_v4_dicots/gene_families/view/HOM04D000426	No
DEFECTIVE IN MERISTEM SILENCING 3 (DMS3)	AT3G49250	A SMC solo hinge protein; part of the DDR complex; involved in the Pol V pathway	unitig_747.g21743.t1	yes	no	yES	yes	Yes	https://genomevolution.org/r/16o7h	https://bioinformatics.psb.ugent.be/plaza/versions/plaza_v4_dicots/gene_families/view/HOM04D001385	No
RNA-DIRECTED DNA METHYLATION 1 (RDM1)	AT3G22680	An AGO4- and Pol II-interacting protein; part of the DDR complex; involved in the Pol V pathway	unitig_22.g6822.t1	yes	yes	Yes	Yes	Yes	https://genomevolution.org/r/16lkk	https://bioinformatics.psb.ugent.be/plaza/versions/plaza_v4_dicots/gene_families/view/HOM04D003846	No
KOW DOMAIN-CONTAINING TRANSCRIPTION FACTOR 1 (KTF1)	AT5G04290	Contains the AGO hook motif; involved in Pol V transcription	unitig_37.g12317.t1	yes	yes	yes	yes	Yes	https://genomevolution.org/r/16qiy	https://bioinformatics.psb.ugent.be/plaza/versions/plaza_v4_dicots/gene_families/view/HOM04D001467	No
INVOLVED IN DE NOVO 2 (IDN2)	AT3G48670	A dsRNA-binding protein in the Pol V pathway	unitig_21.g20294.t1	yes	yes	yes	yes	Yes	https://genomevolution.org/r/16qjg	https://bioinformatics.psb.ugent.be/plaza/versions/plaza_v4_dicots/gene_families/view/HOM04D000527	No
IDN2 PARALOGUE 1 (IDP1)	AT1G15910	Forms a complex with IDN2	unitig_736.g22804.t1	yes	yes	yes	yes	yes	https://genomevolution.org/r/16qk6	https://bioinformatics.psb.ugent.be/plaza/versions/plaza_v4_dicots/gene_families/view/HOM04D000527	No
IDP2	AT4G00380	Forms a complex with IDN2	unitig_736.g22804.t1 or unitig_21.g20294	yes	yes				https://genomevolution.org/r/16qkk	https://bioinformatics.psb.ugent.be/plaza/versions/plaza_v4_dicots/gene_families/view/HOM04D000527
DMS4	AT2G30280	Associated with Pol V and Pol II	unitig_60.g25562	yes	yes	yes	No	Yes	https://genomevolution.org/r/16o7r	https://bioinformatics.psb.ugent.be/plaza/versions/plaza_v4_dicots/gene_families/view/HOM04D006439	No
DOMAINS REARRANGED METHYLTRANSFERASE 2 (DRM2)	AT5G14620	A de novo DNA methyltransferase	unitig_0.g2799.t1	yes	yes	yes	yes	Yes	https://genomevolution.org/r/16qlj	https://bioinformatics.psb.ugent.be/plaza/versions/plaza_v4_dicots/genes/view/AT5G14620	No
SUVH2	AT2G33290	An SRA domain protein that binds to methylated DNA and recruits Pol V	unitig_899.g15553.t1	Yes	yes	Yes	Yes	Yes	https://genomevolution.org/r/16qm1	https://bioinformatics.psb.ugent.be/plaza/versions/plaza_v4_dicots/gene_families/view/HOM04D000252	No
SUVH9	AT4G13460	An SRA domain protein that binds to methylated DNA and recruits Pol V	unitig_21.g20145.t1, unitig_744.g24612.t1	yes	YES	Yes	YES	Yes	https://genomevolution.org/r/16qms	https://bioinformatics.psb.ugent.be/plaza/versions/plaza_v4_dicots/gene_families/view/HOM04D000252	No
SUVR2	AT5G43990	A putative histone methyltransferase	unitig_60.g25730.t1	yes	yes				https://genomevolution.org/r/16qmz	https://bioinformatics.psb.ugent.be/plaza/versions/plaza_v4_dicots/gene_families/view/HOM04D001622	No
MICRORCHIDIA 1 (MORC1)	AT4G36290	A MORC-type ATPase	unitig_61.g26355.t1; Unitig_52.g17485.t1	YES	yes	yes	yes	Yes	https://genomevolution.org/r/16qn7	https://bioinformatics.psb.ugent.be/plaza/versions/plaza_v4_dicots/gene_families/view/HOM04D000807	No
MORC6	AT1G19100	A MORC-type ATPase	unitig_52.g17485.t1	yes	yes	yes	YES	Yes	https://genomevolution.org/r/16qnc	https://bioinformatics.psb.ugent.be/plaza/versions/plaza_v4_dicots/gene_families/view/HOM04D000807	No
SAWADEE HOMEODOMAIN HOMOLOGUE 1 (SHH1)	AT1G15215	Binds to methylated H3K9 and recruits Pol IV	unitig_46.g18563.t1;unitig_21.g20063.t1; unitig_0.g2570.t1	yes	yes	yes	yes	Yes	https://genomevolution.org/r/16qnh	https://bioinformatics.psb.ugent.be/plaza/versions/plaza_v4_dicots/gene_families/view/HOM04D001500	No
HISTONE DEACETYLASE 6 (HDA6)	AT5G63110	A histone deacetylase	unitig_37.g12745.t1	yes	yes	Yes	yes	Yes	https://genomevolution.org/r/16qnv	https://bioinformatics.psb.ugent.be/plaza/versions/plaza_v4_dicots/gene_families/view/HOM04D001037	No
JUMONJI 14 (JMJ14)	AT4G20400	A histone demethylase	unitig_748.g7351.t1	yes	yes	Yes	yes	Yes	https://genomevolution.org/r/16qo0	https://bioinformatics.psb.ugent.be/plaza/versions/plaza_v4_dicots/gene_families/view/HOM04D000355	No
LYSINE-SPECIFIC HISTONE DEMETHYLASE 1 (LDL1)	AT1G62830	A histone demethylase	unitig_88.g27815.t1	Yes	yes	Yes	yes	Yes	https://genomevolution.org/r/16qo9	https://bioinformatics.psb.ugent.be/plaza/versions/plaza_v4_dicots/gene_families/view/HOM04D000403	No
LDL2	AT3G13682	A histone demethylase	unitig_746.g26679.t1	yes	yes	Yes	yes	Yes	https://genomevolution.org/r/16qoh	https://bioinformatics.psb.ugent.be/plaza/versions/plaza_v4_dicots/gene_families/view/HOM04D000403	No
UBIQUITIN-SPECIFIC PROTEASE 26 (UBP26)	AT3G49600	A histone H2B deubiquitinase	unitig_699.g19716.t1; unitig_699.g19717.t1; unitig_699.g19718.t1	Yes	Yes	Yes	Yes	Yes	https://genomevolution.org/r/16qom	https://bioinformatics.psb.ugent.be/plaza/versions/plaza_v4_dicots/gene_families/view/HOM04D001607	No
Additional factors
NEEDED FOR RDR2-INDEPENDENT DNA METHYLATION (NERD)	AT2G16485	Involved in non-canonical RdDM	unitig_60.g25864.t1	yes	yes	Yes	yes	Yes	https://genomevolution.org/r/16qos	https://bioinformatics.psb.ugent.be/plaza/versions/plaza_v4_dicots/gene_families/view/HOM04D000705	No
CHROMOMETHYLASE 2 (CMT2)	AT4G19020	A DNA methyltransferase specific to CHH‡	unitig_37.g12123.t1;	yes	Yes	Yes	yes	Yes	https://genomevolution.org/r/16qpl	https://bioinformatics.psb.ugent.be/plaza/versions/plaza_v4_dicots/gene_families/view/HOM04D001291	No
CMT3	AT1G69770	A DNA methyltransferase specific to CHG‡	unitig_899.g15024.t1; unitig_899.g15023.t1	yes	yes	Yes	yes	No evidence of chromo domain	https://genomevolution.org/r/16qpu	https://bioinformatics.psb.ugent.be/plaza/versions/plaza_v4_dicots/gene_families/view/HOM04D001291	No
METHYLTRANSFERASE 1 (MET1)	AT5G49160	A DNA methyltransferase specific to CG	unitig_26.g9010.t1	yes	yes	yES	yes	Yes	https://genomevolution.org/r/16qqe	https://bioinformatics.psb.ugent.be/plaza/versions/plaza_v4_dicots/gene_families/view/HOM04D002243	No
SUVH4	AT5G13960	A H3K9 methyltransferase	unitig_37.g12010.t1;unitig_747.g21876.t1	yes	yes	Yes	No	Yes	https://genomevolution.org/r/16qqt	https://bioinformatics.psb.ugent.be/plaza/versions/plaza_v4_dicots/gene_families/view/HOM04D000252	No
DECREASED DNA METHYLATION 1 (DDM1)	AT5G66750	A chromatin remodeller	unitig_37.gg12365.t1	yes	yes	Yes	yes	Yes	https://genomevolution.org/r/16qra	https://bioinformatics.psb.ugent.be/plaza/versions/plaza_v4_dicots/gene_families/view/HOM04D000102	No
OTHER
CLSY2	AT5G20420		unitig_0.g1244.t1	yes	yes	Yes	yes	No evidence of Sawadee domain	https://genomevolution.org/r/16qrg	https://bioinformatics.psb.ugent.be/plaza/versions/plaza_v4_dicots/gene_families/view/HOM04D000426	No
